# Supplementary material for: Meta-analysis of grey matter changes and their behavioral characterization in patients with alcohol use disorder
Source: PubMed Central journal article supplement (PMC7933165; doi:10.1038/s41598-021-84804-7), 2021-03-04
Supplement: 41598_2021_84804_MOESM1_ESM.pdf [file 41598_2021_84804_MOESM1_ESM.pdf]

## **Supplementary Material**

### **Meta-analysis of grey matter changes and their behavioral characterization in patients with Alcohol Use Disorder**

Carolin Spindler<sup>1</sup>, Sebastian Trautmann<sup>1</sup>, Nina Alexander<sup>1</sup>, Sonja Bröning<sup>1,2</sup>, Sarah Bartscher<sup>3</sup>, Markus Stuppe<sup>4</sup> and Markus Muehlhan<sup>1\*</sup>.

- 1) MSH Medical School Hamburg, Faculty of Human Sciences, Department of Psychology, Hamburg, Germany
- 2) MSH Medical School Hamburg, Faculty of Health Sciences, Department of Pedagogy, Hamburg, Germany
- 3) MSH Medical School Hamburg, Hafencity Institute for Psychotherapy, Hamburg, Germany
- 4) Helios Medical Center Schwerin, Carl-Friedrich-Flemming-Clinic, Department of Addiction Medicine, Schwerin, Germany

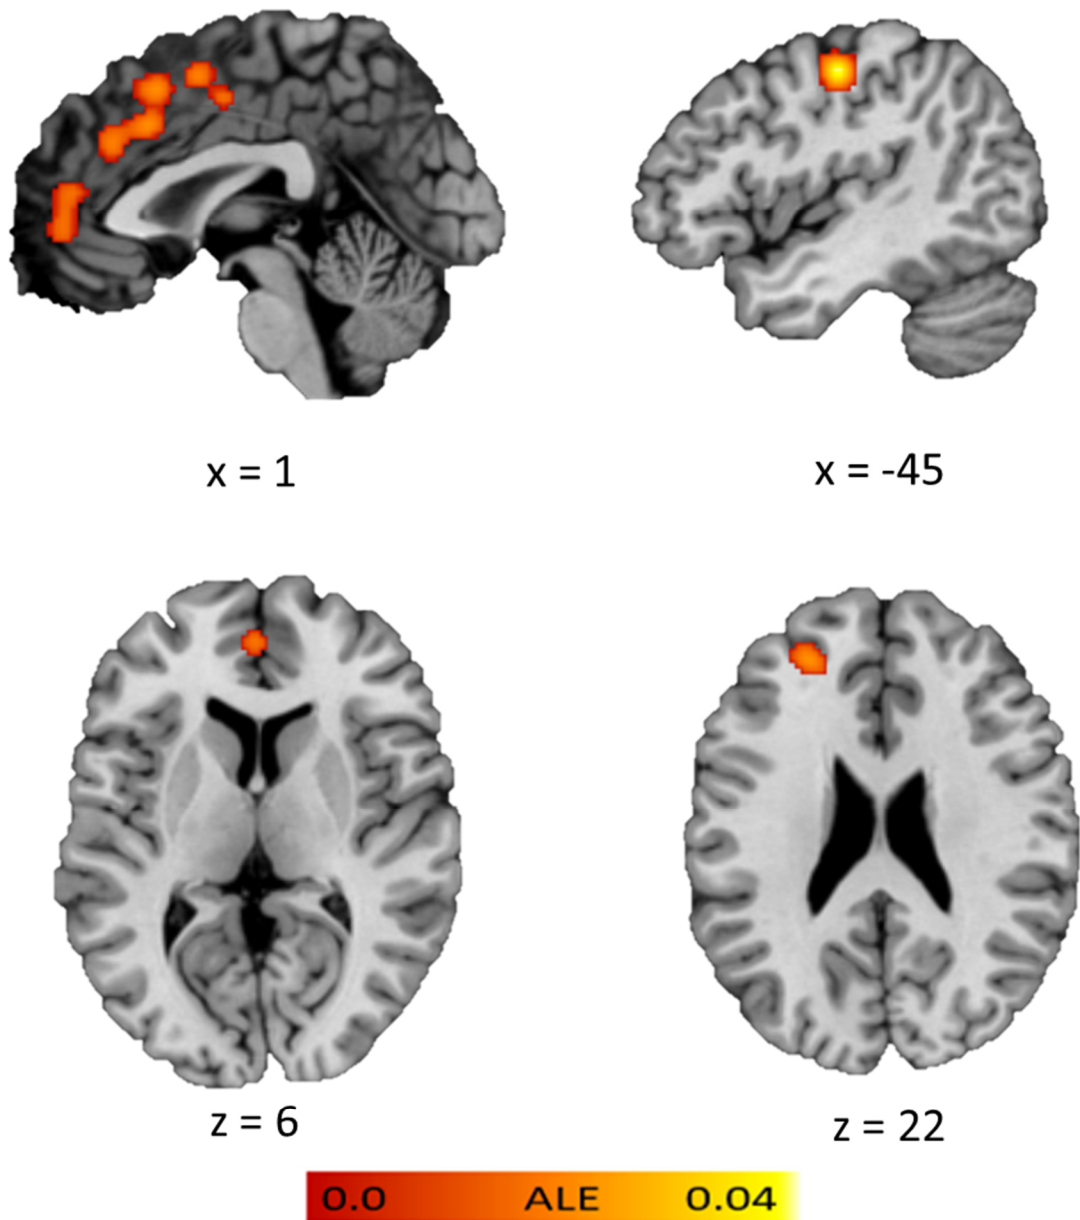

**Fig. S1. Results of an ALE sub-analysis examining which regions show a change in the GM volume in the contrast AUD < HC.** Cluster-forming threshold  $p < 0.001$ , family wise error (FWE) cluster level corrected at  $p < 0.05$ .  $x$ ,  $y$  and  $z$  values refer to coordinates in MNI space, for detailed MNI peak voxel coordinates of the ALE clusters see table S4.

**Table S1**

Studies where the reported foci were pooled into one experiment.

|    |                       |
|----|-----------------------|
| 1a | Bach et al., 2017     |
| 1b | Bach et al., 2020     |
| 2a | Chanraud et al., 2007 |
| 2b | Chanraud et al., 2009 |
| 3a | Galandra et al., 2018 |
| 3b | Galandra et al., 2020 |
| 4a | Wang et al., 2016     |
| 4b | Wang et al., 2018     |

## References

- Bach, P., Koopmann, A., Bumb, J. M., Vollstädt-Klein, S., Reinhard, I., Rietschel, M., ... Kiefer, F. (2020). Leptin predicts cortical and subcortical gray matter volume recovery in alcohol dependent patients: A longitudinal structural magnetic resonance imaging study. *Hormones and Behavior*, *124*, 104749. <https://doi.org/10.1016/j.yhbeh.2020.104749>
- Bach, P., Zois, E., Vollstädt-Klein, S., Kirsch, M., Hoffmann, S., Jorde, A., ... Kiefer, F. (2017). Association of the alcohol dehydrogenase gene polymorphism rs1789891 with gray matter brain volume, alcohol consumption, alcohol craving and relapse risk. *Addiction Biology*, *24*(1), 110–120. <https://doi.org/10.1111/adb.12571>
- Chanraud, S, Leroy, C., Martelli, C., Kostogianni, N., & Delain, F. (2009). Episodic Memory in Detoxified Alcoholics: Contribution of Grey Matter Microstructure Alteration. *PLoS ONE*, *4*(8), 6786. <https://doi.org/10.1371/journal.pone.0006786>
- Chanraud, Sandra, Martelli, C., Delain, F., Kostogianni, N., Douaud, G., Aubin, H. J., ... Martinot, J. L. (2007). Brain morphometry and cognitive performance in detoxified alcohol-dependents with preserved psychosocial functioning. *Neuropsychopharmacology*, *32*(2), 429–438. <https://doi.org/10.1038/sj.npp.1301219>
- Galandra, C., Basso, G., Manera, M., Crespi, C., Giorgi, I., Vittadini, G., ... Canessa, N. (2018). Salience network structural integrity predicts executive impairment in alcohol use disorders. *Scientific Reports*, *8*(1), 14481. <https://doi.org/10.1038/s41598-018-32828-x>
- Galandra, C., Crespi, C., Basso, G., Manera, M. R., Giorgi, I., Poggi, P., & Canessa, N. (2020). Decreased information processing speed and decision-making performance in alcohol use disorder: combined neurostructural evidence from VBM and TBSS. *Brain Imaging and Behavior*, 1–11. <https://doi.org/10.1007/s11682-019-00248-8>
- Wang, J., Fan, Y., Dong, Y., Ma, M., Dong, Y., Niu, Y., ... Cui, C. (2018). Combining gray matter volume in the cuneus and the cuneus-prefrontal connectivity may predict early relapse in abstinent alcohol-dependent patients. *PLOS ONE*, *13*(5), e0196860. <https://doi.org/10.1371/journal.pone.0196860>
- Wang, J., Fan, Y., Dong, Y., Ma, M., Ma, Y., Dong, Y., ... Cui, C. (2016). Alterations in Brain Structure and Functional Connectivity in Alcohol Dependent Patients and Possible Association with Impulsivity. *PLoS One*, *11*(8), e0161956. <https://doi.org/10.1371/journal.pone.0161956>

**Table S2**

Methodological characteristics of the studies included in the ALE meta-analysis.

| #  | Source                       | Field strength | Smooth Kernel | Software | Correction     | Threshold | GM measure | Covariates                                 | No. of Foci | Reference Space | Source of coordinates |
|----|------------------------------|----------------|---------------|----------|----------------|-----------|------------|--------------------------------------------|-------------|-----------------|-----------------------|
| 1  | Asensio et al. (2016)        | 1.5            | 8mm           | SPM5     | k ≥ 50         | p < 0.05  | Volume     | age, total GMV and WMV                     | 2           | MNI             | Table 2               |
| 2  | Bach et al. (2017)           | 3              | 8mm           | SPM8     | k ≥ 115        | p < 0.001 | Volume     | age, sex, smoking                          | 22          | MNI             | Table 2               |
| 3  | Bach et al. (2020)           | 3              | 8mm           | SPM12    | FWE and k > 10 | p < 0.05  | Volume     | age, sex, abstinence, BMI, smoking and TIV | 11          | MNI             | Table 2               |
| 4  | Chanraud et al. (2007)       | 1.5            | 8mm           | SPM2     | FDR            | p < 0.005 | Volume     | age, education, smoking                    | 10          | MNI             | Table 3               |
| 5  | Chanraud et al. (2009)       | 1.5            | 8mm           | SPM2     | FDR            | p < 0.001 | Volume     | age                                        | 14          | MNI             | Table 3               |
| 6  | Charlet et al. (2013)        | 3              | 8mm           | SPM8     | k ≥ 63         | p < 0.001 | Volume     | age, smoking, BIS, BDI, STAI-T             | 36          | MNI             | suppl. Table 1        |
| 7  | Demirakca et al. (2011)      | 1.5            | 8mm           | SPM8     | FWE            | p < 0.05  | Volume     | age, sex, TIV                              | 9           | MNI             | Table 3               |
| 8  | Galandra et al. (2018)       | 3              | 8mm           | SPM12    | FDR            | p < 0.025 | Density    | age                                        | 29          | MNI             | suppl. Table 2        |
| 9  | Galandra et al. (2020)       | 3              | 8mm           | SPM12    | FWE            | p < 0.05  | Density    | age, smoking                               | 18          | MNI             | Table 2               |
| 10 | Grodin et al. (2013)         | 1.5            | 3mm           | FSL      | PBNP           | p < 0.01  | Volume     | age, education                             | 18          | MNI             | Table 2               |
| 11 | Guggenmos et al. (2017)      | 3              | 8mm           | SPM12    | FWE            | p < 0.05  | Volume     | age, sex, site, smoking, general health    | 22          | MNI             | suppl. Table 1        |
| 12 | Jang et al. (2007)           | 3              | 8mm           | SPM2     | FDR            | p < 0.05  | Density    | -                                          | 12          | TAL             | Table 3               |
| 13 | Mechtcheriakov et al. (2007) | 1.5            | 10mm          | SPM2     | FDR            | p < 0.05  | Density    | global mean voxel values, TIV              | 13          | MNI             | Table 1               |
| 14 | Nurmedov et al. (2016)       | 1.5            | 8mm           | SPM      | FWE            | p < 0.05  | Volume     | age, sex                                   | 37          | MNI             | Table 2               |
| 15 | Pitel et al. (2012)          | 1.5            | 10mm          | SPM5     | FDR            | p < 0.05  | Volume     | age, sex                                   | 4           | MNI             | p. c.                 |
| 16 | Rando et al. (2011)          | n. a.          | n. a.         | SPM8     | FWE            | p < 0.025 | Volume     | age, iq                                    | 3           | MNI             | Figure 2              |
| 17 | Reiter et al. (2016)         | 3              | 6mm           | SPM8     | FWE            | p < 0.05  | Density    | TIV                                        | 10          | MNI             | Table 7               |
| 18 | Ritz et al. (2016)           | 3              | 10mm          | SPM5     | FDR            | p < 0.005 | Volume     | -                                          | 11          | MNI             | p. c.                 |
| 19 | Rosenthal et al. (2019)      | 3              | 8mm           | SPM12    | FWE and k > 30 | p < 0.005 | Volume     | age, gender TIV                            | 25          | MNI             | suppl. Table 2        |
| 20 | Segobin et al. (2014)        | 1.5            | 8mm           | SPM5     | FDR            | p < 0.01  | Volume     | age                                        | 4           | MNI             | Figure 1              |
| 21 | Trick et al. (2014)          | 3              | 12mm          | SPM5     | FWE            | p < 0.05  | Volume     | age, TIV                                   | 5           | TAL             | Table 4               |
| 22 | Van Eijk et al. (2013)       | 3              | 8mm           | SPM8     | FWE            | p < 0.05  | Volume     | age, sex, smoking, TIV                     | 19          | MNI             | Table 3               |
| 23 | van Holst et al. (2012)      | 3              | 8mm           | SPM8     | FDR            | p < 0.05  | Volume     | age, iq, smoking, TIV                      | 8           | MNI             | Table 2               |
| 24 | Wang et al. (2016)           | 3              | 8mm           | SPM8     | FWE            | p < 0.05  | Volume     | age, education, total GMV                  | 11          | MNI             | Table 2               |
| 25 | Wang et al. (2018)           | 3              | 8mm           | SPM8     | FWE            | p < 0.05  | Volume     | age, education, smoking, TIV               | 2           | MNI             | Figure 1              |
| 26 | Wiers et al. (2015)          | 3              | 10mm          | SPM8     | FWE            | p < 0.05  | Volume     | age                                        | 1           | MNI             | Figure 2              |
| 27 | Zois et al. (2017)           | 3              | 8mm           | SPM8     | FWE            | p < 0.05  | Volume     | age, sex, BDI, smoking                     | 20          | MNI             | Table 2               |

k=cluster size in voxels , FDR= False Discovery Rate, FWE= Family Wise Error Correction, PBNP=permutation based non-parametric testing, GMV= Gray matter volume, WMV= White matter volume, MNI= Montreal Neurological Institute, BIS= Barratt Impulsivity Scale; BDI= Beck Depression Inventory, STAI-T= Spielberger Trait-Anxiety Inventory, TIV= Total intracranial volume, SPM= Statistical Parametric Mapping, FSL= Freesurfer, BMI= Body-Mass-Index, TAL= Talairach, p.c.= personal correspondence, n.a.= information not available.

**Table S3**

Summarized information and allocation of the experiments contributing to the ALE clusters of convergent grey matter changes in AUD.

| Source                                          | Contributing to ALE cluster # | N AUD patients (female) | Correction method                | Threshold                  | GM measure         | No. of Foci |
|-------------------------------------------------|-------------------------------|-------------------------|----------------------------------|----------------------------|--------------------|-------------|
| Asensio et al. (2016)                           | 1                             | 24 (0)                  | $k \geq 50$                      | $p < 0.05$                 | Volume             | 2           |
| Bach et al. (2017) & Bach et al. (2020)         | 1, 2, 3, 5, 6, 8              | 74 (19)<br>62 (14)      | $k \geq 115$<br>FWE and $k > 10$ | $p < 0.001$<br>$p < 0.05$  | Volume<br>Volume   | 22<br>11    |
| Chanraud et al. (2007) & Chanraud et al. (2009) | 1                             | 26 (0)<br>24 (0)        | FDR<br>FDR                       | $p < 0.005$<br>$p < 0.001$ | Volume<br>Volume   | 10<br>14    |
| Charlet et al. (2013)                           | 1, 2, 3, 4, 6, 7              | 40 (10)                 | $k \geq 63$                      | $p < 0.001$                | Volume             | 36          |
| Demirakca et al. (2011)                         | 1, 2, 7                       | 50 (23)                 | FWE                              | $p < 0.05$                 | Volume             | 9           |
| Galandra et al. (2018) & Galandra et al. (2020) | 1, 2, 4, 5                    | 23 (9)<br>22 (9)        | FDR<br>FWE                       | $p < 0.025$<br>$p < 0.05$  | Density<br>Density | 29<br>18    |
| Grodin et al. (2013)                            | 1                             | 37 (16)                 | PBNP                             | $p < 0.01$                 | Volume             | 18          |
| Guggenmos et al. (2017)                         | 3, 8                          | 119 (18)                | FWE                              | $p < 0.05$                 | Volume             | 22          |
| Jang et al. (2007)                              | 2                             | 20 (0)                  | FDR                              | $p < 0.05$                 | Density            | 12          |
| Mechtcheriakov et al. (2007)                    | 5                             | 22 (8)                  | FDR                              | $p < 0.05$                 | Density            | 13          |
| Nurmedov et al. (2016)                          | 2, 3, 7, 8                    | 24 (4)                  | FWE                              | $p < 0.05$                 | Volume             | 37          |
| Rando et al. (2011)                             | 4                             | 45 (10)                 | FWE                              | $p < 0.025$                | Volume             | 3           |
| Reiter et al. (2016)                            | 1, 2, 4, 7                    | 43 (9)                  | FWE                              | $p < 0.05$                 | Density            | 10          |
| Ritz et al. (2016)                              | 1                             | 17 (4)                  | FDR                              | $p < 0.005$                | Volume             | 11          |
| Rosenthal et al. (2019)                         | 2                             | 46 (16)                 | FWE and $k > 30$                 | $p < 0.005$                | Volume             | 25          |
| Segobin et al. (2014)                           | 4                             | 19 (2)                  | FDR                              | $p < 0.01$                 | Volume             | 4           |
| Trick et al. (2014)                             | 1, 5                          | 29 (11)                 | FWE                              | $p < 0.05$                 | Volume             | 5           |
| Van Eijk et al. (2013)                          | 3, 5                          | 49 (9)                  | FWE                              | $p < 0.05$                 | Volume             | 19          |
| Wang et al. (2016) & Wang et al. (2018)         | 1, 3, 4, 6                    | 20 (0)<br>56 (0)        | FWE<br>FWE                       | $p < 0.05$<br>$p < 0.05$   | Volume<br>Volume   | 11<br>2     |
| Zois et al. (2017)                              | 1, 2, 3, 4, 5, 6, 7, 8        | 95 (24)                 | FWE                              | $p < 0.05$                 | Volume             | 20          |
| <b>Not contributing:</b>                        |                               |                         |                                  |                            |                    |             |
| Pitel et al. (2012)                             |                               | 34 (6)                  | FDR                              | $p < 0.05$                 | Volume             | 4           |
| Van Holst et al. (2012)                         |                               | 36 (0)                  | FDR                              | $p < 0.05$                 | Volume             | 8           |
| Wiers et al. (2015)                             |                               | 22 (0)                  | FWE                              | $p < 0.05$                 | Volume             | 1           |

FDR= False Discovery Rate, FWE= Family Wise Error Correction, PBNP=permutation based non-parametric testing.

**Table S4**

Subgroup Analysis of VBM studies exclusively investigating GM volume differences (referring to Table S2).

ALE clusters significant after cluster-level FWE correction for multiple comparisons.

| Cluster # | Anatomical Label <sup>a</sup> | Peak Voxel Coordinates (MNI) |     |    |    | ALE<br>(*10 <sup>-2</sup> ) <sup>b</sup> | Cluster Size (mm <sup>3</sup> ) | Centre of mass<br>(x, y, z) | No. of contributing<br>experiments (%) |
|-----------|-------------------------------|------------------------------|-----|----|----|------------------------------------------|---------------------------------|-----------------------------|----------------------------------------|
|           |                               | x                            | y   | z  | BA |                                          |                                 |                             |                                        |
| 1         | R Superior Frontal Gyrus      | 4                            | 18  | 48 | 6  | 2.54                                     | 2104                            | 1.9, 22.5, 38.9             | 10 (52.6)                              |
|           | L Cingulate Gyrus             | 0                            | 20  | 36 | 32 | 2.37                                     |                                 |                             |                                        |
|           | L Cingulate Gyrus             | 2                            | 32  | 30 | 32 | 2.14                                     |                                 |                             |                                        |
| 2         | L Postcentral Gyrus           | -44                          | -16 | 48 | 3  | 4.01                                     | 1568                            | -45.2, -15.2, 47.2          | 7 (36.8)                               |
| 3         | L Anterior Cingulate          | -2                           | 50  | 2  | 32 | 1.98                                     | 1096                            | 0.5, 48.6, 5.2              | 6 (31.58)                              |
|           | L Anterior Cingulate          | 2                            | 46  | 12 | 32 | 1.91                                     |                                 |                             |                                        |
| 4         | L Superior Frontal Gyrus      | -24                          | 44  | 24 | 9  | 2.52                                     | 785                             | -23.8, 42.7, 24             | 4 (21.05)                              |
| 5         | L Medial Frontal Gyrus        | 2                            | 2   | 52 | 6  | 2.06                                     | 744                             | 0.3, -.4, 50                | 4 (21.05)                              |
|           | L Paracentral Lobe            | 0                            | -6  | 46 | 31 | 1.92                                     |                                 |                             |                                        |

BA, brodman area; L, left hemisphere; R, right hemisphere; x, y, z coordinates provided in MNI space.

<sup>a</sup> Anatomical labelling according to Talairach Daemon (nearest gray matter within 5mm, talairach.org) associated with the peak coordinates after icbm2tal transformation.

<sup>b</sup> Maximum ALE value observed in the cluster.

**Table S5**

Properties and FSN of the clusters resulting from the meta-analysis.

| Cluster # | Volume (mm <sup>3</sup> ) | Weighted Center (MNI) |       |      | ALE<br>(*10 <sup>-2</sup> ) <sup>a</sup> | No. of contributing<br>experiments (%) | FSN (%) <sup>b</sup> |
|-----------|---------------------------|-----------------------|-------|------|------------------------------------------|----------------------------------------|----------------------|
|           |                           | x                     | y     | z    |                                          |                                        |                      |
| 1         | 3040                      | 1.7                   | 23.4  | 37.6 | 2.72                                     | 12(52.2)                               | 64 (278,3)           |
| 2         | 1664                      | 0.8                   | 47.5  | 9.4  | 2.76                                     | 9 (39.1)                               | 65 (282,6)           |
| 3         | 1456                      | -45.1                 | -15.1 | 47.2 | 4.01                                     | 7 (30.4)                               | 28 (121,7)           |
| 4         | 1264                      | 0.2                   | 1.2   | 49.3 | 2.67                                     | 7 (30.4)                               | 39 (159,6)           |
| 5         | 984                       | 43.5                  | -14.7 | 8.1  | 2.57                                     | 6 (26.1)                               | 5 (21,7)             |
| 6         | 744                       | -33                   | 18.1  | 4    | 2.42                                     | 4 (17.4)                               | 23 (100,0)           |
| 7         | 696                       | 0.9                   | -27.2 | 46.8 | 2.12                                     | 5 (21.7)                               | 23 (100,0)           |
| 8         | 680                       | -23.7                 | 42.6  | 24.1 | 2.51                                     | 4 (17.4)                               | 3 (13,0)             |

x, y, z coordinates provided in MNI space.

a Maximum ALE value observed in the cluster.

b Ratio to the number of experiments included in the meta-analysis.

**Table S6**  
Single Cluster Behavioral and Paradigm Analysis.

| Cluster #                   | Behavioral Analysis       |                      | Paradigm Analysis                |                      |
|-----------------------------|---------------------------|----------------------|----------------------------------|----------------------|
|                             | Domain (- Category)       | Z-Score <sup>a</sup> | Paradigm Class                   | Z-Score <sup>b</sup> |
| 1                           | Action                    |                      | Reward                           | 5.87                 |
|                             | - Inhibition              | 5.55                 | Go/No-Go                         | 5.54                 |
|                             | Cognition                 |                      | Semantic Monitor/Discrimination  | 4.66                 |
|                             | - Attention               | 8.56                 | Pain Monitor/Discrimination      | 3.73                 |
|                             | - Reasoning               | 5.95                 | n-back                           | 3.52                 |
|                             | - Language (Semantics)    | 5.67                 | Stroop-Color                     | 3.50                 |
|                             | - Language (Speech)       | 4.74                 | Face Monitor/Discrimination      | 3.48                 |
|                             | - Memory (Working)        | 4.26                 | Cued Explicit Recognition/Recall | 3.30                 |
|                             | - Memory (Explicit)       | 4.17                 |                                  |                      |
|                             | Emotion                   |                      |                                  |                      |
|                             | - Positive (Reward/Gain)  | 5.81                 |                                  |                      |
|                             | - Negative (Fear)         | 3.80                 |                                  |                      |
|                             | Perception                |                      |                                  |                      |
|                             | - Somesthesia (Pain)      | 3.86                 |                                  |                      |
| 2                           | Emotion                   |                      | n. s.                            |                      |
|                             | - Positive (Reward/Gain)  | 3.02                 |                                  |                      |
| 3                           | Action                    |                      | n. s.                            |                      |
|                             | - Execution (Unspecified) | 4.54                 |                                  |                      |
|                             | - Execution (Speech)      | 3.48                 |                                  |                      |
| 4                           | Action                    |                      | Pain Monitor/Discrimination      | 5.37                 |
|                             | - Execution (Unspecified) | 7.09                 |                                  |                      |
|                             | Cognition                 |                      |                                  |                      |
|                             | - Attention               | 3.84                 |                                  |                      |
|                             | Perception                |                      |                                  |                      |
|                             | - Somesthesia (Pain)      | 5.31                 |                                  |                      |
| - Somesthesia (Unspecified) | 3.99                      |                      |                                  |                      |
| 5                           | n. s.                     |                      | n. s.                            |                      |
| 6                           | Cognition                 |                      | Reward                           | 4.13                 |
|                             | - Attention               | 5.36                 | Pain Monitor/Discrimination      | 4.12                 |
|                             | - Language (Semantics)    | 4.79                 | Cued Explicit Recognition/Recall | 3.51                 |
|                             | - Language (Speech)       | 4.75                 |                                  |                      |
|                             | - Memory (Explicit)       | 4.57                 |                                  |                      |
|                             | - Reasoning               | 4.37                 |                                  |                      |
|                             | - Memory (Working)        | 3.86                 |                                  |                      |
|                             | - Language (Phonology)    | 3.21                 |                                  |                      |
|                             | Emotion                   |                      |                                  |                      |
|                             | - Positive (Reward/Gain)  | 4.02                 |                                  |                      |
|                             | Perception                |                      |                                  |                      |
| - Somesthesia (Pain)        | 4.19                      |                      |                                  |                      |
| 7                           | n. s.                     |                      | n. s.                            |                      |
| 8                           | n. s.                     |                      | n. s.                            |                      |

a the significance threshold was set at Z-Scores  $\geq 3.0$  with  $p \leq 0.05$  (corrected for multiple comparisons).  
b the significance threshold was set at Z-Scores  $\geq 3.3$  with  $p \leq 0.05$  (corrected for multiple comparisons).  
n. s.= no results with values above significance thresholds.



**Table S7a**

MACM Results Cluster 1. All results were significant at a cluster-forming threshold of  $p < 0.001$  and cluster level FWE corrected at  $p < 0.05$ .

| Clusters of convergent coactivation | Peak Voxel Coordinates (MNI) |     |     | ALE-Value   | Cluster Size (mm <sup>3</sup> ) | No. of contributing experiments |
|-------------------------------------|------------------------------|-----|-----|-------------|---------------------------------|---------------------------------|
|                                     | x                            | y   | z   |             |                                 |                                 |
| 1                                   | -34                          | 20  | 0   | 0.33163333  | 143488                          | 383                             |
|                                     | 36                           | 22  | -2  | 0.3237866   |                                 |                                 |
|                                     | -46                          | 8   | 30  | 0.23798378  |                                 |                                 |
|                                     | 8                            | -16 | 8   | 0.1957702   |                                 |                                 |
|                                     | 48                           | 10  | 30  | 0.1828575   |                                 |                                 |
|                                     | 44                           | 38  | 20  | 0.17541309  |                                 |                                 |
|                                     | -10                          | -16 | 8   | 0.15826043  |                                 |                                 |
|                                     | -44                          | 28  | 20  | 0.150994    |                                 |                                 |
|                                     | 14                           | 8   | 4   | 0.1390841   |                                 |                                 |
|                                     | -42                          | 2   | 44  | 0.13688838  |                                 |                                 |
|                                     | -30                          | 0   | 52  | 0.11462588  |                                 |                                 |
|                                     | -14                          | 2   | 8   | 0.113632455 |                                 |                                 |
|                                     | 30                           | 2   | 50  | 0.11068673  |                                 |                                 |
|                                     | 42                           | 2   | 50  | 0.10641379  |                                 |                                 |
|                                     | -18                          | 6   | -2  | 0.10494852  |                                 |                                 |
|                                     | -14                          | 8   | -2  | 0.104593664 |                                 |                                 |
|                                     | -36                          | 52  | 10  | 0.103003874 |                                 |                                 |
|                                     | 30                           | 10  | 50  | 0.097690575 |                                 |                                 |
|                                     | 36                           | 58  | 0   | 0.09653247  |                                 |                                 |
|                                     | 10                           | -20 | -10 | 0.074515685 |                                 |                                 |
| 2                                   | 4                            | 24  | 40  | 0.54964817  | 34824                           | 422                             |
| 3                                   | -34                          | -52 | 50  | 0.17239326  | 20448                           | 177                             |
|                                     | -28                          | -60 | 50  | 0.16726567  |                                 |                                 |
|                                     | -12                          | -68 | 54  | 0.088638134 |                                 |                                 |
| 4                                   | 32                           | -60 | 48  | 0.15602237  | 18984                           | 166                             |
|                                     | 42                           | -48 | 44  | 0.15338331  |                                 |                                 |
|                                     | 52                           | -40 | 44  | 0.12753169  |                                 |                                 |
|                                     | 14                           | -66 | 54  | 0.08704397  |                                 |                                 |
|                                     | 12                           | -70 | 40  | 0.06418817  |                                 |                                 |
| 5                                   | -34                          | -70 | -24 | 0.08568312  | 4968                            | 57                              |
|                                     | -42                          | -60 | -16 | 0.08497332  |                                 |                                 |
|                                     | -48                          | -62 | -8  | 0.08420824  |                                 |                                 |
|                                     | -36                          | -58 | -32 | 0.08041972  |                                 |                                 |
|                                     | -38                          | -74 | -14 | 0.058467906 |                                 |                                 |
| 6                                   | 36                           | -66 | -24 | 0.093040265 | 3568                            | 43                              |
|                                     | 32                           | -62 | -24 | 0.09303089  |                                 |                                 |

**Table S7b**

MACM Results Cluster 2. All results were significant at a cluster-forming threshold of  $p < 0.001$  and cluster level FWE corrected at  $p < 0.05$ .

| Clusters of convergent coactivation | Peak Voxel Coordinates (MNI) |     |     | ALE-Value   | Cluster Size (mm <sup>3</sup> ) | No. of contributing experiments |
|-------------------------------------|------------------------------|-----|-----|-------------|---------------------------------|---------------------------------|
|                                     | x                            | y   | z   |             |                                 |                                 |
| 1                                   | 0                            | 54  | -6  | 0.24690546  | 30856                           | 136                             |
|                                     | 2                            | 52  | 6   | 0.19464613  |                                 |                                 |
|                                     | -8                           | 14  | -6  | 0.050341137 |                                 |                                 |
|                                     | 6                            | 54  | 28  | 0.046710197 |                                 |                                 |
|                                     | 8                            | 16  | -6  | 0.043208823 |                                 |                                 |
|                                     | -4                           | 54  | 24  | 0.04283518  |                                 |                                 |
|                                     | -10                          | 8   | 0   | 0.039518587 |                                 |                                 |
|                                     | 4                            | 32  | -10 | 0.034798622 |                                 |                                 |
|                                     | 10                           | 8   | 0   | 0.03345645  |                                 |                                 |
|                                     | -8                           | 42  | 34  | 0.026556727 |                                 |                                 |
| 2                                   | -2                           | -56 | 34  | 0.060931638 | 9368                            | 43                              |
|                                     | -6                           | -52 | 10  | 0.02637327  |                                 |                                 |
| 3                                   | -50                          | -64 | 32  | 0.047953356 | 3784                            | 23                              |
|                                     | -44                          | -72 | 36  | 0.035014596 |                                 |                                 |
| 4                                   | -2                           | -8  | 8   | 0.039817594 | 2072                            | 15                              |
|                                     | 10                           | -16 | 8   | 0.03670676  |                                 |                                 |
|                                     | -12                          | -12 | 10  | 0.026731731 |                                 |                                 |
| 5                                   | 26                           | -8  | -18 | 0.042187333 | 2032                            | 15                              |
| 6                                   | -24                          | 34  | 46  | 0.035304863 | 1808                            | 13                              |
|                                     | -16                          | 36  | 46  | 0.032867692 |                                 |                                 |
|                                     | -24                          | 44  | 36  | 0.030805739 |                                 |                                 |
| 7                                   | -22                          | -8  | -18 | 0.036467757 | 1352                            | 10                              |
|                                     | -10                          | -8  | -12 | 0.029832246 |                                 |                                 |
| 8                                   | -60                          | -40 | -6  | 0.03722415  | 1248                            | 12                              |
| 9                                   | 2                            | 30  | 32  | 0.035821535 | 1248                            | 11                              |

**Table S7c**

MACM Results Cluster 3. All results were significant at a cluster-forming threshold of  $p < 0.001$  and cluster level FWE corrected at  $p < 0.05$ .

| Clusters of convergent coactivation | Peak Voxel Coordinates (MNI) |     |     | ALE-Value   | Cluster Size (mm <sup>3</sup> ) | No. of contributing experiments |
|-------------------------------------|------------------------------|-----|-----|-------------|---------------------------------|---------------------------------|
|                                     | x                            | y   | z   |             |                                 |                                 |
| 1                                   | -48                          | -8  | 50  | 0.33674714  | 67928                           | 186                             |
|                                     | -34                          | 24  | 2   | 0.10316383  |                                 |                                 |
|                                     | -52                          | 12  | -2  | 0.09674179  |                                 |                                 |
|                                     | -46                          | 4   | 32  | 0.0787183   |                                 |                                 |
|                                     | -30                          | -56 | 56  | 0.076787524 |                                 |                                 |
|                                     | -56                          | 2   | 28  | 0.07417022  |                                 |                                 |
|                                     | -26                          | -60 | 48  | 0.07244639  |                                 |                                 |
|                                     | -54                          | 10  | 22  | 0.06965458  |                                 |                                 |
|                                     | -48                          | 10  | 26  | 0.06799032  |                                 |                                 |
|                                     | -62                          | -30 | 10  | 0.066048376 |                                 |                                 |
|                                     | -48                          | -32 | 48  | 0.062875554 |                                 |                                 |
|                                     | -54                          | -22 | 2   | 0.05832966  |                                 |                                 |
|                                     | -56                          | -18 | 2   | 0.058148272 |                                 |                                 |
|                                     | -38                          | -44 | 44  | 0.05572988  |                                 |                                 |
|                                     | -58                          | -26 | 22  | 0.054233063 |                                 |                                 |
|                                     | -38                          | -34 | 56  | 0.053416442 |                                 |                                 |
|                                     | -52                          | -40 | 26  | 0.053196292 |                                 |                                 |
|                                     | -40                          | -34 | 14  | 0.049284752 |                                 |                                 |
|                                     | -54                          | -42 | 10  | 0.041775964 |                                 |                                 |
| 2                                   | -2                           | 0   | 62  | 0.18160295  | 21272                           | 129                             |
|                                     | -2                           | 6   | 52  | 0.15005694  |                                 |                                 |
|                                     | 6                            | 16  | 42  | 0.09877476  |                                 |                                 |
| 3                                   | 54                           | 0   | 46  | 0.10635519  | 19552                           | 95                              |
|                                     | 42                           | -4  | 52  | 0.088226184 |                                 |                                 |
|                                     | 50                           | -8  | 38  | 0.084761195 |                                 |                                 |
|                                     | 52                           | 10  | 24  | 0.055808786 |                                 |                                 |
|                                     | 44                           | 16  | 24  | 0.053543564 |                                 |                                 |
|                                     | 60                           | 0   | 22  | 0.053188767 |                                 |                                 |
|                                     | 32                           | 0   | 58  | 0.052359074 |                                 |                                 |
|                                     | 28                           | -6  | 50  | 0.040719192 |                                 |                                 |
| 4                                   | 30                           | -62 | -26 | 0.09542059  | 16216                           | 71                              |
|                                     | 22                           | -58 | -22 | 0.07265582  |                                 |                                 |
|                                     | -42                          | -64 | -12 | 0.07180755  |                                 |                                 |
|                                     | -30                          | -62 | -26 | 0.07052057  |                                 |                                 |
|                                     | -12                          | -62 | -18 | 0.05408267  |                                 |                                 |
|                                     | 10                           | -68 | -18 | 0.052541234 |                                 |                                 |
|                                     | 2                            | -60 | -18 | 0.052352797 |                                 |                                 |
| 5                                   | -12                          | -18 | 4   | 0.111134574 | 10304                           | 65                              |
|                                     | -22                          | 4   | 4   | 0.082967944 |                                 |                                 |

Table S7c continued

|   |     |     |     |             |      |    |
|---|-----|-----|-----|-------------|------|----|
|   | -12 | -2  | 14  | 0.040946186 |      |    |
|   |     |     |     |             |      |    |
| 6 | 24  | 2   | 4   | 0.108101025 | 8168 | 53 |
|   | 12  | -18 | 4   | 0.09322881  |      |    |
|   |     |     |     |             |      |    |
| 7 | 66  | -32 | 10  | 0.07541736  | 6160 | 42 |
|   | 58  | -16 | 4   | 0.06216356  |      |    |
|   |     |     |     |             |      |    |
| 8 | 36  | 22  | 2   | 0.09817634  | 5864 | 43 |
|   | 56  | 10  | -10 | 0.041534133 |      |    |
|   |     |     |     |             |      |    |
| 9 | 32  | -60 | 52  | 0.051839065 | 3472 | 23 |
|   | 34  | -46 | 46  | 0.048213158 |      |    |
|   | 48  | -38 | 48  | 0.038891118 |      |    |
|   | 32  | -64 | 40  | 0.03749644  |      |    |
|   |     |     |     |             |      |    |

**Table S7d**

MACM Results Cluster 4. All results were significant at a cluster-forming threshold of  $p < 0.001$  and cluster level FWE corrected at  $p < 0.05$ .

| Clusters of convergent coactivation | Peak Voxel Coordinates (MNI) |     |     | ALE-Value   | Cluster Size (mm <sup>3</sup> ) | No. of contributing experiments |
|-------------------------------------|------------------------------|-----|-----|-------------|---------------------------------|---------------------------------|
|                                     | x                            | y   | z   |             |                                 |                                 |
| 1                                   | 0                            | 10  | 50  | 0.69207853  | 236664                          | 400                             |
|                                     | -32                          | 20  | 2   | 0.25548097  |                                 |                                 |
|                                     | 36                           | 20  | 0   | 0.2549885   |                                 |                                 |
|                                     | -12                          | -16 | 8   | 0.23443471  |                                 |                                 |
|                                     | -46                          | 6   | 30  | 0.2139869   |                                 |                                 |
|                                     | 10                           | -16 | 8   | 0.20276067  |                                 |                                 |
|                                     | 50                           | 10  | 28  | 0.20274189  |                                 |                                 |
|                                     | -46                          | -2  | 44  | 0.19726895  |                                 |                                 |
|                                     | -26                          | -62 | 50  | 0.1753548   |                                 |                                 |
|                                     | 24                           | 2   | 4   | 0.16268954  |                                 |                                 |
|                                     | 48                           | 16  | -4  | 0.15998583  |                                 |                                 |
|                                     | -40                          | -16 | 54  | 0.1598747   |                                 |                                 |
|                                     | -20                          | 6   | 2   | 0.15770315  |                                 |                                 |
|                                     | -26                          | -4  | 54  | 0.15695606  |                                 |                                 |
|                                     | 34                           | -2  | 56  | 0.1471871   |                                 |                                 |
|                                     | 36                           | -50 | 48  | 0.14329492  |                                 |                                 |
|                                     | 40                           | -2  | 52  | 0.14191836  |                                 |                                 |
|                                     | -50                          | 8   | 2   | 0.13978432  |                                 |                                 |
|                                     | 28                           | -64 | 54  | 0.1286012   |                                 |                                 |
|                                     | 38                           | 44  | 28  | 0.10803274  |                                 |                                 |
|                                     | 62                           | -32 | 28  | 0.10365503  |                                 |                                 |
|                                     | -60                          | -26 | 8   | 0.08832339  |                                 |                                 |
|                                     | 48                           | -36 | 46  | 0.08773879  |                                 |                                 |
|                                     | -52                          | -24 | 20  | 0.08732655  |                                 |                                 |
|                                     | -38                          | 44  | 24  | 0.08301589  |                                 |                                 |
|                                     | 38                           | 54  | 10  | 0.07572825  |                                 |                                 |
|                                     | 54                           | -26 | 42  | 0.06816243  |                                 |                                 |
|                                     | -26                          | -76 | 32  | 0.06708826  |                                 |                                 |
|                                     | 32                           | -72 | 32  | 0.06550684  |                                 |                                 |
|                                     | -50                          | -34 | 12  | 0.06373383  |                                 |                                 |
|                                     | -60                          | -10 | 4   | 0.059944507 |                                 |                                 |
|                                     |                              |     |     |             |                                 |                                 |
| 2                                   | -34                          | -56 | -30 | 0.11084647  | 10416                           | 106                             |
|                                     | -42                          | -60 | -16 | 0.10423207  |                                 |                                 |
|                                     | -26                          | -64 | -24 | 0.09039151  |                                 |                                 |
|                                     | -38                          | -74 | -12 | 0.07887538  |                                 |                                 |
|                                     |                              |     |     |             |                                 |                                 |
| 3                                   | 32                           | -62 | -26 | 0.1176925   | 5664                            | 69                              |
|                                     | 44                           | -60 | -18 | 0.06764966  |                                 |                                 |
|                                     |                              |     |     |             |                                 |                                 |
| 4                                   | 60                           | -24 | 8   | 0.09303442  | 3528                            | 40                              |
|                                     |                              |     |     |             |                                 |                                 |

**Table S7e**

MACM Results Cluster 5. All results were significant at a cluster-forming threshold of  $p < 0.001$  and cluster level FWE corrected at  $p < 0.05$ .

| Clusters of convergent coactivation | Peak Voxel Coordinates (MNI) |     |     | ALE-Value   | Cluster Size (mm <sup>3</sup> ) | No. of contributing experiments |
|-------------------------------------|------------------------------|-----|-----|-------------|---------------------------------|---------------------------------|
|                                     | x                            | y   | z   |             |                                 |                                 |
| 1                                   | -46                          | -22 | 6   | 0.075857356 | 22656                           | 60                              |
|                                     | -50                          | -16 | 2   | 0.071482964 |                                 |                                 |
|                                     | -56                          | -12 | 12  | 0.04910549  |                                 |                                 |
|                                     | -46                          | 8   | -2  | 0.042659517 |                                 |                                 |
|                                     | -58                          | -4  | 20  | 0.039180387 |                                 |                                 |
|                                     | -62                          | -26 | 22  | 0.03293335  |                                 |                                 |
|                                     | -52                          | 10  | -4  | 0.03235797  |                                 |                                 |
|                                     | -36                          | 20  | 2   | 0.031398352 |                                 |                                 |
| 2                                   | 50                           | -12 | 4   | 0.19495137  | 18832                           | 82                              |
|                                     | 62                           | -24 | 22  | 0.036936358 |                                 |                                 |
|                                     | 60                           | 0   | 18  | 0.03622244  |                                 |                                 |
|                                     | 48                           | -10 | 38  | 0.034469627 |                                 |                                 |
| 3                                   | -4                           | -2  | 62  | 0.049664114 | 4904                            | 22                              |
|                                     | 6                            | 16  | 36  | 0.03918255  |                                 |                                 |
|                                     | 0                            | 4   | 50  | 0.037966803 |                                 |                                 |
| 4                                   | 44                           | 8   | 4   | 0.043459233 | 3800                            | 18                              |
|                                     | 36                           | 20  | 4   | 0.037898652 |                                 |                                 |
| 5                                   | -50                          | -8  | 46  | 0.045419127 | 3056                            | 18                              |
| 6                                   | -24                          | -62 | -20 | 0.041024506 | 2360                            | 14                              |
|                                     | -18                          | -62 | -20 | 0.040627137 |                                 |                                 |
| 7                                   | -8                           | -14 | 4   | 0.03542749  | 2128                            | 14                              |
|                                     | -12                          | -28 | 2   | 0.02441962  |                                 |                                 |
| 8                                   | 24                           | 2   | 6   | 0.04158319  | 2112                            | 13                              |
|                                     | 26                           | 0   | -6  | 0.032958817 |                                 |                                 |
| 9                                   | -26                          | -6  | -6  | 0.041825753 | 1832                            | 14                              |
|                                     | -22                          | -4  | -18 | 0.024585413 |                                 |                                 |
| 10                                  | 12                           | -16 | 6   | 0.037333004 | 1744                            | 10                              |
| 11                                  | 18                           | -60 | -20 | 0.043022238 | 1440                            | 11                              |

**Table S7f**

MACM Results Cluster 6. All results were significant at a cluster-forming threshold of  $p < 0.001$  and cluster level FWE corrected at  $p < 0.05$ .

| Clusters of convergent coactivation | Peak Voxel Coordinates (MNI) |     |             | ALE-Value   | Cluster Size (mm <sup>3</sup> ) | No. of contributing experiments |
|-------------------------------------|------------------------------|-----|-------------|-------------|---------------------------------|---------------------------------|
|                                     | x                            | y   | z           |             |                                 |                                 |
| 1                                   | -34                          | 20  | 0           | 0.6778235   | 132136                          | 303                             |
|                                     | 36                           | 22  | -2          | 0.37349984  |                                 |                                 |
|                                     | -46                          | 6   | 30          | 0.21459693  |                                 |                                 |
|                                     | 48                           | 8   | 26          | 0.17455442  |                                 |                                 |
|                                     | -10                          | -14 | 4           | 0.1555588   |                                 |                                 |
|                                     | 14                           | 6   | 0           | 0.14325024  |                                 |                                 |
|                                     | 10                           | -16 | 6           | 0.14198972  |                                 |                                 |
|                                     | -54                          | 10  | 8           | 0.12271503  |                                 |                                 |
|                                     | -46                          | 26  | 22          | 0.12187719  |                                 |                                 |
|                                     | -20                          | 8   | 2           | 0.109429464 |                                 |                                 |
|                                     | 48                           | 4   | 42          | 0.10425648  |                                 |                                 |
|                                     | 44                           | 38  | 20          | 0.09739923  |                                 |                                 |
|                                     | -28                          | 0   | 54          | 0.09293294  |                                 |                                 |
|                                     | 44                           | 28  | 26          | 0.084873214 |                                 |                                 |
|                                     | -38                          | 46  | 20          | 0.08185789  |                                 |                                 |
|                                     | 28                           | 2   | 52          | 0.0795518   |                                 |                                 |
|                                     | -44                          | -4  | 52          | 0.079535425 |                                 |                                 |
|                                     | 20                           | -4  | -12         | 0.077424705 |                                 |                                 |
|                                     | -36                          | -4  | 58          | 0.074888684 |                                 |                                 |
|                                     | 40                           | 48  | 10          | 0.07260532  |                                 |                                 |
| -6                                  | -20                          | -12 | 0.07140302  |             |                                 |                                 |
| 44                                  | 50                           | -2  | 0.06908849  |             |                                 |                                 |
| -20                                 | -4                           | -14 | 0.06472745  |             |                                 |                                 |
| -38                                 | 52                           | 6   | 0.06365843  |             |                                 |                                 |
| 8                                   | -20                          | -12 | 0.056404267 |             |                                 |                                 |
| 2                                   | 0                            | 16  | 46          | 0.22630031  | 28752                           | 233                             |
|                                     | 4                            | 20  | 42          | 0.22422123  |                                 |                                 |
|                                     | -2                           | 34  | 26          | 0.08522093  |                                 |                                 |
| 3                                   | 32                           | -56 | 50          | 0.10961987  | 17496                           | 131                             |
|                                     | 44                           | -46 | 46          | 0.102738276 |                                 |                                 |
|                                     | 60                           | -28 | 6           | 0.08526672  |                                 |                                 |
|                                     | 62                           | -42 | 32          | 0.07413719  |                                 |                                 |
|                                     | 56                           | -24 | 20          | 0.06651594  |                                 |                                 |
|                                     | 60                           | -32 | 18          | 0.06592737  |                                 |                                 |
|                                     | 14                           | -68 | 54          | 0.06212902  |                                 |                                 |
| 54                                  | -44                          | 16  | 0.059666086 |             |                                 |                                 |
| 4                                   | -32                          | -52 | 46          | 0.14485683  | 17032                           | 137                             |
|                                     | -26                          | -66 | 48          | 0.13219751  |                                 |                                 |
|                                     | -46                          | -42 | 48          | 0.11258497  |                                 |                                 |
|                                     | -46                          | -38 | 46          | 0.112434946 |                                 |                                 |

Table S7f continued

|   |     |     |     |             |       |    |
|---|-----|-----|-----|-------------|-------|----|
|   | -42 | -44 | 44  | 0.11013844  |       |    |
|   |     |     |     |             |       |    |
| 5 | -44 | -60 | -14 | 0.10913099  | 11088 | 93 |
|   | -36 | -56 | -30 | 0.08374652  |       |    |
|   | -30 | -64 | -28 | 0.082052335 |       |    |
|   |     |     |     |             |       |    |
| 6 | 32  | -64 | -26 | 0.09590842  | 3120  | 40 |
|   | 46  | -64 | -4  | 0.05967176  |       |    |
|   |     |     |     |             |       |    |



**Table S7g**

MACM Results Cluster 7. All results were significant at a cluster-forming threshold of  $p < 0.001$  and cluster level FWE corrected at  $p < 0.05$ .

| Clusters of convergent coactivation | Peak Voxel Coordinates (MNI) |     |    | ALE-Value   | Cluster Size (mm <sup>3</sup> ) | No. of contributing experiments |
|-------------------------------------|------------------------------|-----|----|-------------|---------------------------------|---------------------------------|
|                                     | x                            | y   | z  |             |                                 |                                 |
| 1                                   | 4                            | -16 | 50 | 0.07811668  | 8432                            | 32                              |
|                                     | 2                            | -26 | 50 | 0.06981361  |                                 |                                 |
|                                     | 6                            | -8  | 66 | 0.015520015 |                                 |                                 |
|                                     | 0                            | -4  | 42 | 0.013998251 |                                 |                                 |
| 2                                   | 36                           | 18  | 4  | 0.025004093 | 1592                            | 8                               |
|                                     | 44                           | 10  | 2  | 0.02043405  |                                 |                                 |
|                                     | 58                           | 14  | 2  | 0.013594652 |                                 |                                 |
|                                     |                              |     |    |             |                                 |                                 |

**Table S7h**

MACM Results Cluster 8. All results were significant at a cluster-forming threshold of  $p < 0.001$  and cluster level FWE corrected at  $p < 0.05$ .

| Clusters of convergent coactivation | Peak Voxel Coordinates (MNI) |    |    | ALE-Value   | Cluster Size (mm <sup>3</sup> ) | No. of contributing experiments |
|-------------------------------------|------------------------------|----|----|-------------|---------------------------------|---------------------------------|
|                                     | x                            | y  | z  |             |                                 |                                 |
| 1                                   | 8                            | 26 | 30 | 0.030556392 | 6560                            | 19                              |
|                                     | -4                           | 10 | 52 | 0.030547412 |                                 |                                 |
|                                     | 6                            | 16 | 46 | 0.019976819 |                                 |                                 |
|                                     | 8                            | 10 | 62 | 0.019708596 |                                 |                                 |
|                                     | -4                           | 14 | 42 | 0.019433334 |                                 |                                 |
| 2                                   | -26                          | 50 | 18 | 0.13117135  | 5952                            | 35                              |
| 3                                   | -32                          | 22 | 4  | 0.03542612  | 2616                            | 13                              |
|                                     | -36                          | 10 | 8  | 0.019815054 |                                 |                                 |
| 4                                   | 42                           | 18 | 2  | 0.023411926 | 2424                            | 9                               |
|                                     | 34                           | 24 | 6  | 0.017192915 |                                 |                                 |
|                                     |                              |    |    |             |                                 |                                 |

**Table S8**

Study inclusion and exclusion differences between previous and current meta-analysis (MA).

| <b>Included in current MA</b>                 | <b>Xiao et al. (2015)</b> | <b>Yang et al. (2016)</b> | <b>Klaming et al. (2019)</b> |
|-----------------------------------------------|---------------------------|---------------------------|------------------------------|
| Asensio et al. (2016)                         |                           |                           |                              |
| Bach et al. (2017)                            |                           |                           |                              |
| Bach et al. (2020)                            |                           |                           |                              |
| Chanraud et al. (2007)                        | X                         | X                         | X                            |
| Chanraud et al. (2009)                        |                           | X                         |                              |
| Charlet et al. (2014)                         | X                         |                           | X                            |
| Demirakca et al. (2011)                       | X                         | X                         | X                            |
| Galandra et al. (2018)                        |                           |                           |                              |
| Galandra et al. (2020)                        |                           |                           |                              |
| Grodin et al. (2013)                          | X                         | X                         | X                            |
| Guggenmos et al. (2017)                       |                           |                           |                              |
| Jang et al. (2007)                            | X                         | X                         | X                            |
| Mechtcheriakov et al. (2007)                  | X                         | X                         | X                            |
| Nurmedov et al. (2016)                        |                           |                           | X                            |
| Pitel et al. (2012)                           |                           |                           |                              |
| Rando et al. (2011)                           | X                         |                           | X                            |
| Reiter et al. (2016)                          |                           |                           |                              |
| Ritz et al. (2016)                            |                           |                           |                              |
| Rosenthal et al. (2019)                       |                           |                           |                              |
| Segobin et al. (2014)                         |                           | X                         | X                            |
| Trick et al. (2014)                           |                           |                           |                              |
| Van Eijk et al. (2013)                        |                           |                           |                              |
| van Holst et al. (2012)                       | X                         | X                         | X                            |
| Wang et al. (2016)                            |                           |                           | X                            |
| Wang et al. (2018)                            |                           |                           |                              |
| Wiers et al. (2015)                           |                           |                           | X                            |
| Zois et al. (2017)                            |                           |                           | X                            |
|                                               |                           |                           |                              |
| <b>Excluded in current MA (reasons)</b>       |                           |                           |                              |
| Brooks et al., 2014 (adolescent sample)       |                           | X                         |                              |
| Dalvie et al., 2014 (adolescent sample)       |                           | X                         |                              |
| Fein et al. 2013, (adolescent sample)         |                           | X                         |                              |
| Howell et al.,2013 (adolescent sample)        |                           | X                         |                              |
| Li et al., 2011 (no access, chinese language) | X                         |                           |                              |

**Table S9**

Checklist for neuroimaging meta-analysis according to Müller et al. (2018).

|                                                                                  |                                                                                                                                                                                                                                                                                                                                                                                                                                                                                                                                                                                                                                                                                             |
|----------------------------------------------------------------------------------|---------------------------------------------------------------------------------------------------------------------------------------------------------------------------------------------------------------------------------------------------------------------------------------------------------------------------------------------------------------------------------------------------------------------------------------------------------------------------------------------------------------------------------------------------------------------------------------------------------------------------------------------------------------------------------------------|
| <p>The research question is specifically defined</p>                             | <p>YES, and it includes the following contrast:<br/><u>whole brain GM changes in AUD vs whole brain GM changes in HCs.</u><br/><br/><b>→ Introduction, last paragraph</b></p>                                                                                                                                                                                                                                                                                                                                                                                                                                                                                                               |
| <p>The literature search was systematic</p>                                      | <p>YES, it included the following keywords in the following databases:<br/><br/><u>Keywords:</u> (Alcohol Dependence OR Dependence, Alcohol OR Alcohol Addiction OR Addiction, Alcohol OR Alcoholic Intoxication, Chronic OR Chronic Alcoholic Intoxication OR Intoxication, Chronic Alcoholic OR Alcohol Use Disorder OR Alcohol Use Disorders OR Use Disorder, Alcohol OR Use Disorders, Alcohol OR Alcohol Abuse OR Abuse, Alcohol) AND (voxel-based morphometry OR VBM OR structural MRI).<br/><br/><u>Databases:</u> PubMed, PsycINFO and Web of Science databases (up to June 1, 2020).<br/><br/><b>→ Methods section: Literature Search, Study Selection and Data Extraction</b></p> |
| <p>Detailed inclusion and exclusion criteria are included</p>                    | <p>YES, and reasons of non-standard criterion were:<br/><br/><u>Exclusion of studies reporting null-findings - they can not be taken into account because they do not provide spatial coordinates, which are a prerequisite for the coordinate-based meta-analytical approach.</u><br/><br/><b>→ Methods section: Literature Search, Study Selection and Data Extraction</b></p>                                                                                                                                                                                                                                                                                                            |
| <p>Sample overlap was taken into account</p>                                     | <p>YES, using the following method:<br/><br/><u>Pooling the foci into one experiment and considering the smaller sample size in a conservative approach.</u><br/><br/><b>→ Methods section: Literature Search, Study Selection and Data Extraction</b></p>                                                                                                                                                                                                                                                                                                                                                                                                                                  |
| <p>All experiments use the same search coverage (state how brain coverage is</p> | <p>YES, the search coverage is the following:</p>                                                                                                                                                                                                                                                                                                                                                                                                                                                                                                                                                                                                                                           |

|                                                                                                                                                                                                                                                                                                                                      |                                                                                                                                                                                                                                                                                                                                                                                                                                                |
|--------------------------------------------------------------------------------------------------------------------------------------------------------------------------------------------------------------------------------------------------------------------------------------------------------------------------------------|------------------------------------------------------------------------------------------------------------------------------------------------------------------------------------------------------------------------------------------------------------------------------------------------------------------------------------------------------------------------------------------------------------------------------------------------|
| <p>assessed and how small volume corrections and conjunctions are taken into account)</p>                                                                                                                                                                                                                                            | <p><u>whole brain coverage only, verified via details of the scanner parameters provided in the method section of the papers and average brain sizes provided by Müller et al. 2018.</u></p> <p><b>→ Methods section: Literature Search, Study Selection and Data Extraction</b></p>                                                                                                                                                           |
| <p>Studies are converted to a common reference space</p>                                                                                                                                                                                                                                                                             | <p>Yes, using the following conversion:</p> <p><u>Coordinates reported in Talairach space were transformed into MNI space using the Lancaster transform icbm2tal implemented in GingerALE.</u></p> <p><b>→ Methods section: Anatomical Likelihood Estimation</b></p>                                                                                                                                                                           |
| <p>Data extraction have been conducted by two investigators (ideal case) or double checked by the same investigator (state how double-checking was performed)</p>                                                                                                                                                                    | <p>YES, the following authors:</p> <p><u>CS</u> checked the inclusion criteria<br/> <u>CS</u> extracted coordinates<br/> <u>CS</u> extracted other info: demographic sample characteristics and methodological characteristics<br/> <u>MM</u> double-checked for the following data: <u>all</u></p> <p><b>→ Methods section: Literature Search, Study Selection and Data Extraction</b></p>                                                    |
| <p>The paper includes a table with at least the references, basic study description (e. g. for fMRI tasks: stimuli), contrasts and basic sample descriptions (e.g. size, mean age and gender distribution, specific characteristics) of the included studies, source of information (e.g. contact with authors), reference space</p> | <p>YES, and also the following data:</p> <p><u>MRI</u>: field strength<br/> <u>Pre-processing</u>: Smooth Kernel, Software<br/> <u>Analysis</u>: Method and threshold of correcting for multiple comparisons, GM Measure, Covariates<br/> <u>Results</u>: No. Foci, Reference Space, Source of coordinates</p> <p><u>Clinical sample characteristics</u>: Diagnosis and Duration, Abstinence Duration</p> <p><b>→ Table 1 and table S2</b></p> |
| <p>The study protocol was previously registered and all analyses planned beforehand, including the methods and parameters used for inference, correction for multiple testing, etc.</p>                                                                                                                                              | <p>Yes:</p> <p>1) The meta-analysis was registered before starting the starting the search at:<br/> <u>PROSPERO (CRD42020190710)</u></p> <p><b>→ Methods section: Beginning</b></p> <p>2) Any non-planned analyses are clearly stated as post-hoc or non-prespecified in the paper.</p> <ol style="list-style-type: none"> <li>1. Sub-analysis of ‘volume’ studies</li> <li>2. Assessment of Publication Bias</li> </ol>                       |

|                                               |                                                                                                                                                                                                                                                                                        |
|-----------------------------------------------|----------------------------------------------------------------------------------------------------------------------------------------------------------------------------------------------------------------------------------------------------------------------------------------|
|                                               | <p>→ <b>Methods section, Results and Discussion</b></p> <p>3) The meta-analysis used the default methods and parameters of the software.</p> <p>→ <b>Methods section: Anatomical Likelihood Estimation</b></p>                                                                         |
| <p>The meta-analysis includes diagnostics</p> | <p>YES, the following:</p> <p><u>Number of experiments contributing to the resulting ALE-clusters and summarized information and allocation of the experiments contributing to the ALE clusters of convergent grey matter changes in AUD.</u></p> <p>→ <b>Table 2 and table S3</b></p> |
